# Supplementary material for: Construction of High-Density Genetic Maps and Detection of QTLs Associated With Huanglongbing Tolerance in Citrus
Source: Front Plant Sci. 2018 Nov 27;9:1694. doi: 10.3389/fpls.2018.01694 (PMC6278636; doi:10.3389/fpls.2018.01694)
Supplement: FILE S2 — Analysis of parental genotypes and distribution of SNP loci on reference genome in four parental varieties. [file Table_2.xlsx]

## Sheet: Parental genotype
Supplementary File S2 Analysis of parental genotypes and distribution of SNP loci on reference genome in four parental varieties
	Analysis of two trifoliate oranges Flying Dragon vs Argentina
						ArgT
						A	C	G	T	Y	R	W	S	K	M	-
				FDT	A	9828	15	37	6	0	105	41	0	0	35	22			192	FDT and ArgT homozygous for different alleles
					C	9	11521	5	23	107	0	0	29	0	49	26			43060	homozygous for same allele
					G	21	8	11780	8	0	105	0	31	43	0	29			3297	heterozygous for same alleles
					T	11	33	16	9931	96	0	41	0	37	0	30			719	FDT homozygous, ArgT heterozygous
					Y	0	102	0	106	947	0	1	0	0	0	0			670	ArgT homozygous, FDT heterozygous
					R	89	0	88	0	0	991	0	0	0	1	1			107	ArgT nocall, FDT homozygous
					W	35	0	0	35	0	0	344	0	0	0	1			377	FDT nocall, ArgT homozygous
					S	0	33	31	0	0	0	0	292	0	0	0			39	FDT nocall, ArgT heterozygous
					K	0	0	37	39	0	0	0	0	366	0	0			3	ArgT nocall, FDT heterozygous
					M	29	46	0	0	0	0	0	0	0	357	1			2	ArgT heterozygous, FDT heterozygous, but for 1 different allele
					-	103	102	88	84	16	7	4	5	3	4	3221			3221
																		total	51687	correct
				Avg Call Qual -all markers	124.058										total	51687
				FDT<>ArgT	122.658														46357	identical loci
																			47940	total loci with call
	Aanalysis of two sweet oranges Sanford vs Succari																		96.698	% identity
																			29.6415	% variable loci differing
						Succari
						A	C	G	T	Y	R	W	S	K	M	-
				Sanford	A	7808	1	3	3	0	68	23	0	0	29	12			24	San and Succ homozygous for different alleles
					C	1	10304	0	3	77	0	0	16	0	32	13			36363	homozygous for same allele
					G	2	0	10428	1	0	68	0	24	32	0	13			13531	heterozygous for same alleles
					T	4	4	2	7823	61	0	33	0	19	0	11			482	San homozygous, Succ heterozygous
					Y	0	65	0	56	4090	0	0	0	0	0	0			397	Succ homozygous, San heterozygous
					R	51	0	45	0	0	4116	0	0	0	0	0			49	Succ nocall, San homozygous
					W	25	1	0	27	0	0	1478	0	0	1	0			43	San nocall, Succ homozygous
					S	0	21	14	0	0	0	0	1166	1	0	1			13	San nocall, Succ heterozygous
					K	0	0	26	24	0	0	0	0	1384	0	0			1	Succ nocall, San heterozygous
					M	20	22	0	0	0	0	0	0	0	1297	0			2	Succ heterozygous, San heterozygous, but for 1 different allele
					-	11	13	10	9	3	1	0	2	5	2	782			782
																		total	51687	correct
															total	51687
																			49894	identical loci
																			50799	total loci with call
																			98.2185	% identity
Analysis of genomic distribution of markers in trifoliate oranges																			6.09993	% variable loci differing
	Count of differences per Mb interval												Count of total markers per Mb interval											Proportion of markers differing betwee ArgT and FDT per interval below
MB/scaffold	1	2	3	4	5	6	7	8	9			MB/scaffold	1	2	3	4	5	6	7	8	9			MB/scaffold	1	2	3		5	6	7	8	9
1	27	4	6	2	3	0	19	33	3			1	392	201	306	236	201	112	398	416	351			1	0.0688776	0.0199005	0.0196078		0.0149254	0	0.0477387	0.0793269	0.00854701
2	8	1	6	7	8	0	20	4	5			2	348	16	431	283	54	61	305	274	349			2	0.0229885	0.0625	0.0139211		0.148148	0	0.0655738	0.0145985	0.0143266
3	20	1	1	19	0	0	22	4	5			3	363	21	322	373	116	56	364	269	319			3	0.0550964	0.047619	0.00310559		0	0	0.0604396	0.0148699	0.015674
4	20	6	5	14	2	0	22	12	2			4	292	57	384	294	68	12	318	254	396			4	0.0684932	0.105263	0.0130208		0.0294118	0	0.0691824	0.0472441	0.00505051
5	5	3	4	0	1	0	32	5	7			5	241	102	283	39	44	25	386	213	296			5	0.0207469	0.0294118	0.0141343		0.0227273	0	0.0829016	0.0234742	0.0236486
6	4	11	18	7	0	0	16	1	0			6	234	188	276	123	83	35	291	140	139			6	0.017094	0.0585106	0.0652174		0	0	0.0549828	0.00714286	0
7	0	4	11	12	2	0	6	3	0			7	182	246	282	155	80	64	253	180	89			7	0	0.0162602	0.0390071		0.025	0	0.0237154	0.0166667	0
8	7	4	1	10	0	0	11	0	0			8	154	259	307	151	8	62	228	104	90			8	0.0454545	0.015444	0.00325733		0	0	0.0482456	0	0
9	11	5	5	2	0	0	13	2	0			9	129	268	245	44	49	63	246	86	52			9	0.0852713	0.0186567	0.0204082		0	0	0.0528455	0.0232558	0
10	7	4	0	2	1	0	17	0	0			10	88	271	137	53	74	80	227	57	60			10	0.0795455	0.0147601	0		0.0135135	0	0.0748899	0	0
11	1	1	0	0	0	3	21	0	0			11	53	228	100	45	34	106	232	39	48			11	0.0188679	0.00438596	0		0	0.0283019	0.0905172	0	0
12	0	0	6	2	0	3	16	0	0			12	54	233	97	103	17	127	179	13	89			12	0	0	0.0618557		0	0.023622	0.0893855	0	0
13	0	1	0	0	2	1	16	0	2			13	36	95	66	107	89	108	88	44	89			13	0	0.0105263	0		0.0224719	0.00925926	0.181818	0	0.0224719
14	2	0	1	1	0	1	12	0	0			14	46	127	64	62	30	135	179	28	87			14	0.0434783	0	0.015625		0	0.00740741	0.0670391	0	0
15	6	2	0	10	2	2	2	1	2			15	103	101	43	259	32	151	78	35	141			15	0.0582524	0.019802	0		0.0625	0.013245	0.025641	0.0285714	0.0141844
16	0	3	0	16	1	3	10	0	2			16	67	76	30	163	108	195	103	29	143			16	0	0.0394737	0		0.00925926	0.0153846	0.0970874	0	0.013986
17	6	1	0	5	0	18	6	0	1			17	90	50	58	173	52	277	109	93	32			17	0.0666667	0.02	0		0	0.0649819	0.0550459	0	0.03125
18	10	0	1	11	2	10	1	7	0			18	185	14	44	233	71	233	122	239	89			18	0.0540541	0	0.0227273		0.028169	0.0429185	0.00819672	0.0292887	0
19	18	0	0	21	2	23	1	2	0			19	184	23	51	284	65	348	98	151	18			19	0.0978261	0	0		0.0307692	0.066092	0.0102041	0.013245	0
20	12	0	1	16	2	19	4	1	0			20	78	55	53	310	96	332	161	183	21			20	0.153846	0	0.0188679		0.0208333	0.0572289	0.0248447	0.00546448	0
21	2	2	1	12	0	19	5	6	2			21	118	95	72	305	78	378	224	252	27			21	0.0169492	0.0210526	0.0138889		0	0.0502646	0.0223214	0.0238095	0.0740741
22	20	1	0	11	1	15	0	3	1			22	162	130	44	386	82	336	21	246	100			22	0.123457	0.00769231	0		0.0121951	0.0446429	0	0.0121951	0.01
23	22	1	6	4	1	23		4	0			23	269	128	136	393	28	329	0	380	93			23	0.0817844	0.0078125	0.0441176		0.0357143	0.0699088		0.0105263	0
24	29	5	0	0	0	11		5	2			24	327	225	76	340	24	322		417	75			24	0.088685	0.0222222	0		0	0.0341615		0.0119904	0.0266667
25	25	4	3	11	0	19		6	1			25	385	123	108	351	82	277		384	91			25	0.0649351	0.0325203	0.0277778		0	0.0685921		0.015625	0.010989
26	12	12	1	13	0	8		0	3			26	321	168	79	197	45	290		17	196			26	0.0373832	0.0714286	0.0126582		0	0.0275862		0	0.0153061
27	1	9	0	0	4	0			3			27	224	171	18	0	107	0		0	187			27	0.00446429	0.0526316	0		0.0373832				0.0160428
28	2	11	1		3				4			28	276	258	122		66				204			28	0.00724638	0.0426357	0.00819672		0.0454545				0.0196078
29	5	7	2		0				2			29	376	237	107		10				218			29	0.0132979	0.0295359	0.0186916		0				0.00917431
30	0	15	0		1				6			30	0	372	77		138				268			30		0.0403226	0		0.00724638				0.0223881
31		19	1		4				3			31		289	107		161				265			31		0.0657439	0.00934579		0.0248447				0.0113208
32		19	2		2				0			32		289	82		157				82			32		0.0657439	0.0243902		0.0127389				0
33		22	1		1							33		352	93		197				0			33		0.0625	0.0107527		0.00507614
34		15	1		8							34		365	70		278							34		0.0410959	0.0142857		0.028777
35		18	0		4							35		420	59		294							35		0.0428571	0		0.0136054
36		12	0		0							36		402	61		301							36		0.0298507	0		0
37		6	5		2							37		130	145		278							37		0.0461538	0.0344828		0.00719424
38		0	3		7							38		0	149		275							38			0.0201342		0.0254545
39			2		3							39			135		258							39			0.0148148		0.0116279
40			3		4							40			212		380							40			0.0141509		0.0105263
41			1		22							41			138		421							41			0.00724638		0.0522565
42			0		26							42			260		378							42			0		0.0687831
43			5		1							43			372		392							43			0.0134409		0.00255102
44			5		0							44			335		127							44			0.0149254		0
45			3									45			402		0							45			0.00746269
46			4									46			362									46			0.0110497
47			8									47			341									47			0.0234604
48			2									48			417									48			0.00479616
49			3									49			408									49			0.00735294
50			2									50			388									50			0.00515464
51			4									51			291									51			0.0137457
52			0									52			12									52			0
53																																		total
																								< 0.05	15	29	50		40	20	9	25	31	219
total	282	229	135	208	122	178	272	99	56	1581														%	51.7241	78.3784	96.1538		90.9091	76.9231	40.9091	100	100	81.7164
Leng	29.5	37.5	51.5	26.5	43.5	26.5	21.5	25.5	31.5															intervals	29	37	52		44	26	22	26	32	268
Diff/Mb	9.55932	6.10667	2.62136	7.84906	2.8046	6.71698	12.6512	3.88235	1.77778
																								Above is % of 1 Mb intervals with less than 5% of loci differing between ArgT and FDT
Distribution of the 719 loci heterozygous in ArgT and homozygous in FDT												Distribution of the 670 loci heterozygous in FDT and homozygous in ArgT
MB/scaffold	1	2	3	4	5	6	7	8	9			MB/scaffold	1	2	3	4	5	6	7	8	9
1	8	2	2	0	3	0	9	14	2			1	17	1	2	1	0	0	9	13	1
2	5	1	4	3	5	0	8	3	3			2	3	0	1	2	3	0	11	1	1
3	12	1	0	7	0	0	10	1	2			3	8	0	0	10	0	0	10	1	2
4	8	2	2	9	0	0	13	6	0			4	11	4	2	4	2	0	9	5	1
5	4	2	3	0	0	0	19	0	2			5	1	1	0	0	1	0	9	2	5
6	3	2	7	3	0	0	5	1	0			6	1	5	11	4	0	0	10	0	0
7	0	1	1	9	2	0	3	2	0			7	0	2	9	3	0	0	3	1	0
8	4	2	0	3	0	0	9	0	0			8	3	1	1	6	0	0	1	0	0
9	3	1	1	0	0	0	4	0	0			9	6	3	2	2	0	0	8	0	0
10	2	3	0	2	1	0	10	0	0			10	4	0	0	0	0	0	5	0	0
11	1	0	0	0	0	3	7	0	0			11	0	1	0	0	0	0	14	0	0
12	0	0	5	1	0	2	11	0	0			12	0	0	0	1	0	1	5	0	0
13	0	0	0	0	0	0	2	0	0			13	0	1	0	0	2	0	14	0	2
14	0	0	0	0	0	1	2	0	0			14	1	0	1	1	0	0	9	0	0
15	2	0	0	5	1	1	1	0	2			15	3	1	0	5	0	1	0	0	0
16	0	0	0	6	0	0	6	0	1			16	0	0	0	8	0	2	4	0	1
17	0	0	0	4	0	8	4	0	1			17	5	0	0	1	0	8	2	0	0
18	3	0	0	5	0	9	1	1	0			18	5	0	0	3	2	1	0	3	0
19	13	0	0	15	1	7	1	1	0			19	4	0	0	5	0	12	0	0	0
20	6	0	1	6	0	10	2	0	0			20	4	0	0	9	2	6	2	0	0
21	2	0	0	6	0	9	3	5	2			21	0	2	0	6	0	8	0	1	0
22	9	0	0	5	1	10	0	2	0			22	11	1	0	4	0	3		1	1
23	10	0	3	0	1	14		1	0			23	9	1	2	0	0	9		0	0
24	10	4	0	0	0	5		3	2			24	17	0	0	0	0	6		1	0
25	11	1	2	3	0	10		4	1			25	14	1	0	7	0	9		0	0
26	4	7	0	5	0	4		0	2			26	8	5	0	7	0	4		0	0
27	1	3	0	0	2	0		0	3			27	0	5	0	0	2	0		0	0
28	1	4	1		0				2			28	1	6	0		3				2
29	2	5	0		0				0			29	2	2	2		0				0
30	0	7	0		1				4			30	0	7	0		0				2
31		5	0		0				2			31		9	0		2				1
32		4	0		1				0			32		13	2		0				0
33		12	1		1							33		6	0		0
34		8	0		3							34		6	1		0
35		7	0		3							35		10	0		1
36		7	0		0							36		4	0		0
37		3	2		2							37		2	2		0
38		0	0		3							38			0		2
39			1		0							39			1		3
40			1		1							40			2		1
41			0		12							41			0		8
42			0		8							42			0		14
43			0		1							43			4		0
44			1		0							44			3
45			1									45			0
46			3									46			1
47			7									47			0
48			1									48			1
49			2									49			0
50			0									50			0
51			0									51			1
52			0									52			0
									718												669
Distribution of the percentage of loci in each interval that are heterozygous in ArgT and homozygous in FDT												Distribution of the percentage of loci in each interval that are heterozygous in FDT and heterozygous in ArgT
MB/scaffold	1	2	3	4	5	6	7	8	9			MB/scaffold	1	2	3	4	5	6	7	8	9
1	2.04082	0.995025	0.653595	0	1.49254	0	2.26131	3.36538	0.569801			1	4.33673	0.497512	0.653595	0.423729	0	0	2.26131	3.125	0.2849
2	1.43678	6.25	0.928074	1.06007	9.25926	0	2.62295	1.09489	0.859599			2	0.862069	0	0.232019	0.706714	5.55556	0	3.60656	0.364964	0.286533
3	3.30579	4.7619	0	1.87668	0	0	2.74725	0.371747	0.626959			3	2.20386	0	0	2.68097	0	0	2.74725	0.371747	0.626959
4	2.73973	3.50877	0.520833	3.06122	0	0	4.08805	2.3622	0			4	3.76712	7.01754	0.520833	1.36054	2.94118	0	2.83019	1.9685	0.252525
5	1.65975	1.96078	1.06007	0	0	0	4.92228	0	0.675676			5	0.414938	0.980392	0	0	2.27273	0	2.33161	0.938967	1.68919
6	1.28205	1.06383	2.53623	2.43902	0	0	1.71821	0.714286	0			6	0.42735	2.65957	3.98551	3.25203	0	0	3.43643	0	0
7	0	0.406504	0.35461	5.80645	2.5	0	1.18577	1.11111	0			7	0	0.813008	3.19149	1.93548	0	0	1.18577	0.555556	0
8	2.5974	0.772201	0	1.98675	0	0	3.94737	0	0			8	1.94805	0.3861	0.325733	3.97351	0	0	0.438596	0	0
9	2.32558	0.373134	0.408163	0	0	0	1.62602	0	0			9	4.65116	1.1194	0.816327	4.54545	0	0	3.25203	0	0
10	2.27273	1.10701	0	3.77358	1.35135	0	4.40529	0	0			10	4.54545	0	0	0	0	0	2.20264	0	0
11	1.88679	0	0	0	0	2.83019	3.01724	0	0			11	0	0.438596	0	0	0	0	6.03448	0	0
12	0	0	5.15464	0.970874	0	1.5748	6.14525	0	0			12	0	0	0	0.970874	0	0.787402	2.7933	0	0
13	0	0	0	0	0	0	2.27273	0	0			13	0	1.05263	0	0	2.24719	0	15.9091	0	2.24719
14	0	0	0	0	0	0.740741	1.11732	0	0			14	2.17391	0	1.5625	1.6129	0	0	5.02793	0	0
15	1.94175	0	0	1.9305	3.125	0.662252	1.28205	0	1.41844			15	2.91262	0.990099	0	1.9305	0	0.662252	0	0	0
16	0	0	0	3.68098	0	0	5.82524	0	0.699301			16	0	0	0	4.90798	0	1.02564	3.8835	0	0.699301
17	0	0	0	2.31214	0	2.88809	3.66972	0	3.125			17	5.55556	0	0	0.578035	0	2.88809	1.83486	0	0
18	1.62162	0	0	2.14592	0	3.86266	0.819672	0.41841	0			18	2.7027	0	0	1.28755	2.8169	0.429185	0	1.25523	0
19	7.06522	0	0	5.28169	1.53846	2.01149	1.02041	0.662252	0			19	2.17391	0	0	1.76056	0	3.44828	0	0	0
20	7.69231	0	1.88679	1.93548	0	3.01205	1.24224	0	0			20	5.12821	0	0	2.90323	2.08333	1.80723	1.24224	0	0
21	1.69492	0	0	1.96721	0	2.38095	1.33929	1.98413	7.40741			21	0	2.10526	0	1.96721	0	2.1164	0	0.396825	0
22	5.55556	0	0	1.29534	1.21951	2.97619	0	0.813008	0			22	6.79012	0.769231	0	1.03627	0	0.892857	0	0.406504	1
23	3.71747	0	2.20588	0	3.57143	4.25532		0.263158	0			23	3.34572	0.78125	1.47059	0	0	2.73556		0	0
24	3.0581	1.77778	0	0	0	1.5528		0.719424	2.66667			24	5.19878	0	0	0	0	1.86335		0.239808	0
25	2.85714	0.813008	1.85185	0.854701	0	3.61011		1.04167	1.0989			25	3.63636	0.813008	0	1.9943	0	3.2491		0	0
26	1.24611	4.16667	0	2.53807	0	1.37931		0	1.02041			26	2.49221	2.97619	0	3.5533	0	1.37931		0	0
27	0.446429	1.75439	0		1.86916				1.60428			27	0	2.92398	0		1.86916				0
28	0.362319	1.55039	0.819672		0				0.980392			28	0.362319	2.32558	0		4.54545				0.980392
29	0.531915	2.1097	0		0				0			29	0.531915	0.843882	1.86916		0				0
30		1.88172	0		0.724638				1.49254			30		1.88172	0		0				0.746269
31		1.7301	0		0				0.754717			31		3.11419	0		1.24224				0.377358
32		1.38408	0		0.636943				0			32		4.49827	2.43902		0				0
33		3.40909	1.07527		0.507614							33		1.70455	0		0
34		2.19178	0		1.07914							34		1.64384	1.42857		0
35		1.66667	0		1.02041							35		2.38095	0		0.340136
36		1.74129	0		0							36		0.995025	0		0
37		2.30769	1.37931		0.719424							37		1.53846	1.37931		0
38			0		1.09091							38			0		0.727273
39			0.740741		0							39			0.740741		1.16279
40			0.471698		0.263158							40			0.943396		0.263158
41			0		2.85036							41			0		1.90024
42			0		2.1164							42			0		3.7037
43			0		0.255102							43			1.07527		0
44			0.298507		0							44			0.895522		0
45			0.248756									45			0
46			0.828729									46			0.276243
47			2.05279									47			0
48			0.239808									48			0.239808
49			0.490196									49			0
50			0									50			0
51			0									51			0.343643
52			0									52			0
