# Supplementary material for: Construction of High-Density Genetic Maps and Detection of QTLs Associated With Huanglongbing Tolerance in Citrus
Source: Front Plant Sci. 2018 Nov 27;9:1694. doi: 10.3389/fpls.2018.01694 (PMC6278636; doi:10.3389/fpls.2018.01694)
Supplement: FILE S4 — Phenotypic data of two traits for the evaluation of HLB disease in 86 F1 progenies and nine control varieties. [file Table_4.docx]

**Supplementary File S4** Phenotypic data of two traits for the evaluation of HLB disease in 86 F1 progenies and nine control varieties. The phenotypic traits Foliar Symptom and Canopy Damage were evaluated basing on a 6-point scale visual rating. Each individual have eight replicate trees.

| Ind code | Cross type | Foliar-sym 2015 |  | Foliar-sym 2016 |  | Canopy-dam 2015 |  | Canopy-dam 2016 |  |
| --- | --- | --- | --- | --- | --- | --- | --- | --- | --- |
|  |  | Mean | SD | Mean | SD | Mean | SD | Mean | SD |
| 1 | SanxATf | 3.69 | 0.56 | 3.06 | 0.50 | 3.63 | 0.58 | 3.69 | 0.75 |
| 2 | SanxATf | 3.06 | 0.92 | 2.88 | 0.69 | 1.31 | 0.46 | 1.88 | 0.35 |
| 3 | SanxATf | 2.69 | 0.90 | 3.06 | 0.32 | 2.06 | 0.50 | 2.13 | 0.35 |
| 4 | SanxATf | 3.50 | 0.38 | 3.06 | 0.73 | 3.50 | 0.27 | 3.69 | 0.46 |
| 5 | SanxATf | 3.38 | 0.44 | 2.75 | 0.46 | 2.13 | 0.58 | 2.19 | 0.37 |
| 6 | FDTxSuc | 4.19 | 0.50 | 3.13 | 0.83 | 2.31 | 0.37 | 2.44 | 0.56 |
| 7 | SucxFDT | 3.50 | 0.71 | 2.88 | 0.69 | 1.75 | 0.38 | 2.00 | 0.00 |
| 8 | FDTxSuc | 3.67 | 0.58 | 3.83 | 0.68 | 4.08 | 0.58 | 3.92 | 0.49 |
| 9 | SucxFDT | 2.31 | 0.50 | 2.44 | 0.50 | 1.56 | 0.32 | 2.06 | 0.18 |
| 10 | SanxATf | 2.38 | 0.23 | 2.13 | 0.52 | 2.56 | 0.62 | 2.38 | 0.58 |
| 11 | SanxATf | 2.92 | 0.26 | 2.50 | 0.45 | 3.17 | 0.26 | 3.08 | 0.74 |
| 12 | SanxATf | 3.69 | 0.50 | 2.94 | 0.78 | 3.69 | 0.65 | 3.56 | 0.56 |
| 13 | SanxATf | 2.69 | 0.62 | 3.44 | 0.42 | 3.13 | 0.52 | 3.13 | 0.64 |
| 14 | SucxFDT | 3.39 | 0.75 | 3.21 | 0.64 | 2.64 | 0.63 | 2.93 | 0.35 |
| 15 | FDTxSuc | 3.61 | 0.56 | 3.36 | 0.38 | 2.79 | 0.76 | 3.14 | 0.85 |
| 16 | FDTxSuc | 4.39 | 0.24 | 4.43 | 0.45 | 3.07 | 0.84 | 3.50 | 0.50 |
| 17 | SanxATf | 3.44 | 0.37 | 2.88 | 0.44 | 2.56 | 0.50 | 2.75 | 0.27 |
| 18 | SanxATf | 4.19 | 0.50 | 3.00 | 0.60 | 2.56 | 0.82 | 2.56 | 0.73 |
| 19 | FDTxSuc | 4.38 | 0.35 | 2.88 | 0.64 | 1.81 | 0.46 | 1.94 | 0.32 |
| 20 | SucxFDT | 3.38 | 0.44 | 2.50 | 0.38 | 2.31 | 0.53 | 2.25 | 0.53 |
| 21 | FDTxSuc | 3.38 | 0.75 | 3.75 | 0.29 | 3.25 | 0.50 | 3.38 | 0.48 |
| 22 | SucxFDT | 2.38 | 0.74 | 2.94 | 0.32 | 2.25 | 0.38 | 2.50 | 0.46 |
| 23 | SanxATf | 3.06 | 0.46 | 3.00 | 0.46 | 2.19 | 0.59 | 2.00 | 0.71 |
| 24 | SanxATf | 2.69 | 0.32 | 3.06 | 0.42 | 2.50 | 0.38 | 2.44 | 0.42 |
| 25 | SucxFDT | 2.69 | 0.32 | 2.75 | 0.38 | 1.81 | 0.26 | 2.00 | 0.00 |
| 26 | SanxATf | 3.44 | 0.53 | 3.19 | 0.65 | 2.75 | 0.46 | 2.50 | 0.38 |
| 27 | SanxATf | 1.50 | 0.46 | 2.25 | 0.46 | 1.63 | 0.44 | 1.94 | 0.32 |
| 28 | FDTxSuc | 3.38 | 0.58 | 3.69 | 0.37 | 2.25 | 0.38 | 2.81 | 0.26 |
| 29 | FDTxSuc | 4.18 | 0.35 | 4.07 | 0.35 | 3.50 | 0.58 | 3.93 | 0.45 |
| 30 | SanxATf | 3.56 | 0.65 | 3.56 | 0.62 | 2.44 | 0.42 | 2.19 | 0.65 |
| 31 | SanxATf | 3.06 | 0.53 | 3.25 | 0.53 | 2.38 | 0.69 | 2.56 | 0.68 |
| 32 | SucxFDT | 3.33 | 0.66 | 3.00 | 0.55 | 3.67 | 0.41 | 3.42 | 0.38 |
| 33 | SucxFDT | 3.63 | 0.52 | 3.19 | 0.46 | 2.50 | 0.38 | 2.75 | 0.38 |
| 34 | SanxATf | 3.13 | 0.52 | 2.88 | 0.35 | 2.69 | 0.46 | 2.50 | 0.53 |
| 35 | FDTxSuc | 2.25 | 0.41 | 1.29 | 0.49 | 0.86 | 0.48 | 0.79 | 0.49 |
| 36 | FDTxSuc | 3.75 | 0.46 | 3.44 | 0.50 | 2.25 | 0.53 | 2.13 | 0.35 |
| 37 | FDTxSuc | 4.19 | 0.62 | 3.69 | 0.53 | 2.00 | 0.38 | 2.44 | 0.42 |
| 38 | SucxFDT | 3.13 | 0.64 | 2.75 | 0.65 | 2.31 | 0.46 | 2.31 | 0.37 |
| 39 | SanxATf | 3.81 | 0.42 | 2.94 | 0.50 | 2.38 | 0.44 | 2.38 | 0.44 |
| 40 | SanxATf | 1.31 | 0.42 | 2.81 | 0.53 | 1.94 | 0.50 | 2.44 | 0.32 |
| 41 | SanxATf | 2.00 | 0.60 | 2.69 | 0.80 | 2.38 | 0.69 | 2.56 | 0.68 |
| 42 | SanxATf | 2.63 | 0.74 | 2.94 | 0.42 | 2.00 | 0.53 | 2.38 | 0.35 |
| 43 | FDTxSuc | 3.81 | 0.42 | 3.25 | 0.46 | 2.69 | 0.53 | 2.56 | 0.82 |
| 44 | SanxATf | 3.50 | 0.60 | 2.69 | 0.37 | 2.19 | 0.26 | 1.94 | 0.18 |
| 45 | SucxFDT | 2.63 | 0.23 | 2.44 | 0.56 | 1.63 | 0.52 | 1.69 | 0.46 |
| 46 | SanxATf | 4.00 | 0.46 | 3.44 | 0.50 | 3.19 | 0.88 | 3.19 | 0.70 |
| 47 | SanxATf | 2.81 | 0.32 | 3.06 | 0.42 | 3.56 | 0.82 | 3.44 | 0.56 |
| 48 | SanxATf | 3.32 | 0.45 | 2.71 | 0.39 | 3.21 | 0.57 | 3.21 | 0.49 |
| 49 | SanxATf | 3.69 | 0.56 | 3.00 | 0.60 | 2.38 | 0.35 | 2.56 | 0.42 |
| 50 | SucxFDT | 3.82 | 0.53 | 4.07 | 0.19 | 3.43 | 0.61 | 4.14 | 0.38 |
| 51 | SanxATf | 3.25 | 0.55 | 2.83 | 0.61 | 3.17 | 0.75 | 2.92 | 0.92 |
| 52 | SanxATf | 2.38 | 0.23 | 3.50 | 0.65 | 3.00 | 0.60 | 3.19 | 0.26 |
| 53 | SanxATf | 3.50 | 0.46 | 3.31 | 0.53 | 3.31 | 0.46 | 3.56 | 0.50 |
| 54 | SanxATf | 3.06 | 0.59 | 3.19 | 0.37 | 2.44 | 0.50 | 2.75 | 0.38 |
| 55 | FDTxSuc | 3.55 | 0.85 | 3.58 | 0.58 | 3.68 | 0.35 | 2.96 | 0.56 |
| 56 | FDTxSuc | 4.31 | 0.32 | 4.06 | 0.56 | 2.88 | 0.79 | 3.00 | 0.71 |
| 57 | SanxATf | 1.75 | 0.71 | 2.25 | 0.53 | 1.94 | 0.62 | 1.94 | 0.73 |
| 58 | SanxATf | 3.00 | 0.38 | 3.13 | 0.35 | 3.31 | 0.53 | 3.19 | 0.59 |
| 59 | SanxATf | 3.38 | 0.35 | 3.63 | 0.69 | 4.13 | 0.44 | 4.00 | 0.46 |
| 60 | FDTxSuc | 2.46 | 0.26 | 3.04 | 0.32 | 1.56 | 0.32 | 1.41 | 0.46 |
| 61 | FDTxSuc | 1.88 | 0.44 | 1.88 | 0.44 | 1.06 | 0.32 | 1.13 | 0.35 |
| 62 | SanxATf | 2.44 | 0.84 | 2.56 | 0.68 | 2.50 | 0.76 | 2.63 | 0.79 |
| 63 | SanxATf | 3.25 | 0.71 | 2.94 | 0.32 | 2.44 | 0.68 | 2.38 | 0.52 |
| 64 | FDTxSuc | 4.19 | 0.50 | 3.81 | 0.65 | 2.63 | 0.35 | 2.31 | 0.46 |
| 65 | SucxFDT | 3.44 | 0.84 | 3.13 | 0.35 | 1.31 | 0.26 | 1.75 | 0.27 |
| 66 | SanxATf | 2.63 | 0.74 | 2.75 | 0.46 | 2.50 | 0.71 | 2.31 | 0.46 |
| 67 | FDTxSuc | 3.75 | 0.71 | 4.50 | 0.71 | 2.25 | 1.06 | 4.00 | 1.41 |
| 68 | FDTxSuc | 2.94 | 0.84 | 2.25 | 0.38 | 1.88 | 0.23 | 2.00 | 0.27 |
| 69 | SanxATf | 3.39 | 0.56 | 2.50 | 0.71 | 3.50 | 1.22 | 2.86 | 0.90 |
| 70 | SanxATf | 2.63 | 0.52 | 3.06 | 0.32 | 2.31 | 0.53 | 2.38 | 0.52 |
| 71 | SanxATf | 3.56 | 0.59 | 2.81 | 0.46 | 2.44 | 0.32 | 2.19 | 0.46 |
| 72 | FDTxSuc | 2.43 | 0.35 | 1.94 | 0.32 | 1.63 | 0.44 | 1.81 | 0.46 |
| 73 | FDTxSuc | 4.18 | 0.67 | 3.79 | 0.39 | 2.64 | 0.75 | 2.36 | 0.56 |
| 74 | FDTxSuc | 4.32 | 0.35 | 4.21 | 0.39 | 2.86 | 0.69 | 2.93 | 1.02 |
| 75 | FDTxSuc | 3.92 | 0.61 | 3.92 | 0.20 | 3.00 | 0.55 | 3.17 | 0.26 |
| 76 | SucxFDT | 3.69 | 0.68 | 3.69 | 0.53 | 1.75 | 0.65 | 2.50 | 0.46 |
| 77 | FDTxSuc | 3.54 | 0.53 | 3.64 | 0.42 | 3.51 | 0.53 | 2.95 | 0.38 |
| 78 | SanxATf | 2.75 | 0.89 | 3.19 | 0.46 | 3.69 | 0.75 | 3.75 | 0.65 |
| 79 | SanxATf | 2.31 | 0.50 | 2.19 | 0.46 | 1.94 | 0.42 | 1.81 | 0.37 |
| 80 | SanxATf | 3.44 | 0.53 | 2.38 | 0.44 | 2.13 | 0.44 | 1.88 | 0.44 |
| 81 | SanxATf | 1.56 | 0.26 | 1.75 | 0.27 | 1.25 | 0.38 | 1.50 | 0.38 |
| 82 | SanxATf | 2.63 | 0.64 | 2.63 | 0.44 | 3.31 | 0.37 | 2.63 | 0.58 |
| 83 | FDTxSuc | 4.69 | 0.18 | 3.44 | 0.56 | 1.63 | 0.35 | 1.94 | 0.18 |
| 84 | SanxATf | 2.83 | 0.74 | 3.33 | 0.41 | 3.42 | 0.80 | 3.08 | 0.74 |
| 85 | SucxFDT | 3.38 | 0.44 | 2.69 | 0.70 | 3.88 | 0.69 | 3.69 | 0.70 |
| 86 | SanxATf | 2.75 | 0.38 | 3.13 | 0.58 | 2.56 | 0.68 | 2.50 | 0.71 |
| 87 | Hamlin sweet orange | 4.08 | 0.26 | 3.75 | 0.89 | 3.83 | 0.75 | 3.67 | 0.82 |
| 88 | Navel sweet orange | 3.92 | 0.29 | 3.63 | 0.48 | 4.50 | 0.87 | 4.38 | 0.75 |
| 89 | Argentina trifoliate | 1.13 | 0.35 | 1.38 | 0.44 | 1.31 | 0.46 | 1.06 | 0.18 |
| 90 | Flying Dragon trifoliate | 1.68 | 0.98 | 1.93 | 0.35 | 1.97 | 0.84 | 2.04 | 0.94 |
| 91 | Large Flower trifoliate | 1.56 | 0.70 | 1.44 | 0.18 | 1.25 | 0.38 | 1.25 | 0.38 |
| 92 | Pomeroy trifoliate | 1.19 | 0.32 | 1.38 | 0.35 | 1.31 | 0.46 | 1.00 | 0.00 |
| 93 | Rich 16-6 trifoliate | 1.44 | 0.37 | 1.19 | 0.26 | 1.44 | 0.42 | 1.06 | 0.18 |
| 94 | Rubidoux trifoliate | 1.25 | 0.27 | 1.38 | 0.35 | 1.50 | 0.46 | 1.13 | 0.23 |
| 95 | Volkamer lemon | 2.85 | 0.21 | 2.27 | 0.42 | 1.17 | 0.36 | 1.07 | 0.18 |
